# Supplementary material
Source: PubMed Central journal article supplement (PMC5875957)
Supplement: ASN.2017080903SupplementaryData1.pdf [file ASN.2017080903SupplementaryData1.pdf]

**Supplementary Method 1. The script for quantification of the immunohistochemical staining images**

```
//////////////////////////////////Begin of the script//////////////////////////////////  
  
//change it to the directory of the data folder  
input = "E:\\03-30\\rantes\\";  
list = getFileList(input);  
File.makeDirectory(input+"\\Red");  
for (i = 0; i < list.length; i++)  
{  
    //print (input +list[i]);  
    open (input+list[i]);  
    //select the blue channel, which has the best contrast  
    run ("RGB Stack");  
    setSlice (3);  
    // set threshold  
    setThreshold (0, 15);  
    // measure area and area fraction  
    run ("Set Measurements...", "area integrated area_fraction limit display redirect=None  
decimal=3");  
    run ("Measure");  
    saveAs ("Jpeg", input+"Red\\"+list[i]);  
    close ();  
}  
saveAs("Results", input+"Results.xls");  
//////////////////////////////////End of the script//////////////////////////////////
```

**Supplementary Table 1. Nucleotide sequences of the primers used for RT-PCR**

| <b>Mouse</b>   | <b>Primer Sequence 5' to 3'</b> |                         |
|----------------|---------------------------------|-------------------------|
| <b>gene</b>    | <b>Forward</b>                  | <b>Reverse</b>          |
| PAI-1          | TGGAAAGAGCCAGATTATCAT           | GAAGTAGAGGGCATTACCAG    |
| MMP7           | TAGGCGGATGCTCACTTTT             | TTCTGAATGCCTGCAATGTC    |
| Klotho         | ACGGGGTTGTAGCCAAGAAG            | CGGTAGAAGTGCAGAACCGT    |
| TNF- $\alpha$  | TCGTAGCAAACCACCAAGTG            | CCTTGAAGAGAACCTGGGAG    |
| MCP-1          | CCCACTCACCTGCTGCTAC             | TTCTTGGGGTCAGCACAGA     |
| HGF            | TTCCCGTTGTGAAGGAGATAC           | ATTTCAAACCTAACCATCCACCC |
| $\beta$ -actin | CAGCTGAGAGGGAAATCGTG            | CGTTGCCAATAGTGATGACC    |
